# Supplementary material for: Analyzing experimental UV–vis spectra of conjugated molecules in solution: Pekarian function fit
Source: Royal Society of Chemistry journal article supplement (doi:10.1039/d4nj05537c), 2025-01-01
Supplement: d4nj05537c1.pdf [file d4nj05537c1.pdf]

## Analyzing Experimental UV-Vis Spectra of Conjugated Molecules in

### Solution: PekarFit Function Fit

Nina Larina<sup>a</sup>, Vladimir Khodorkovsky<sup>\*b</sup>

Address: <sup>a</sup>Thales DIS France SAS, Avenue du Pic de Bertagne, 13420, Gémenos, France and <sup>b</sup>Aix Marseille Université, CNRS, CINaM UMR 7325, 13288, Marseille, France. E-mail : vladimir.khodorkovsky@univ-amu.fr

#### Table of content

|                                                                        | Page |
|------------------------------------------------------------------------|------|
| 1. Generalization of P(v).....                                         | 1    |
| 2. Rubrene frequency calculations for ground and transition states...2 |      |
| 3. Fitting results using three PF for DPA absorption spectrum.....3    |      |
| 4. An example of PekarFit output.....3                                 |      |
| 5. User defined function for Origin.....6.                             |      |
| 6. User defined function for PeakFit.....12                            |      |
| 7. PeakFit fitting DPA spectrum output example (2 PF).....13           |      |

$$PF(v) = e^{-S_1 - S_2} \sum_{k_1=0}^{\infty} \frac{S_1^{k_1}}{k_1!} \left[ \sum_{k_2=0}^{\infty} \frac{S_2^{k_2}}{k_2!} G(1, v_0 \pm k_1 \Omega_1 \pm k_2 \Omega_2, \sigma_0) \right] \quad (1S)$$

This approximation can be used in the case when two different  $\Omega$  are visible (spectra recorded in the gas phase, for instance). The signs '+' are for absorption and '-' for fluorescence. Generalization of P(v) for any number of vibrational modes is also possible.

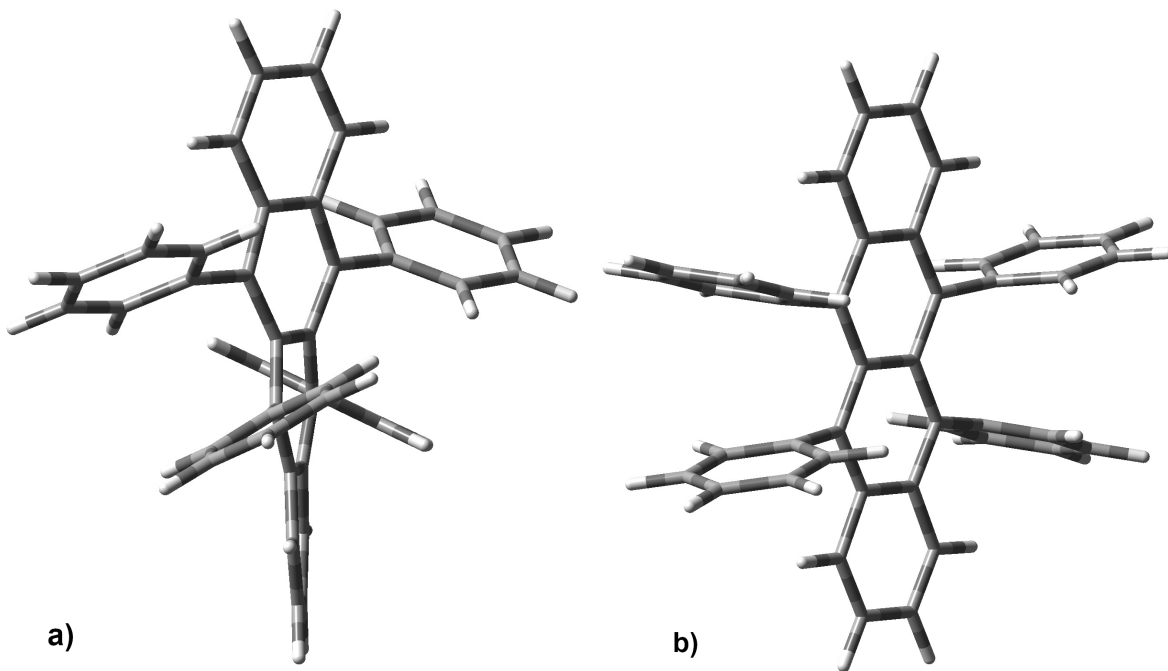

Figure 1S. Rubrene frequency calculation result: B3LYP/Aug-CC-pVDZ; temperature 298.15 K.

a) GS, Imaginary freq = 0; point group = D2; electronic energy (EE) = -1617.5046 Hartree; EE + thermal free energy correction = -1617.0076 Hartree.

b) TS, Imaginary freq = 1; point group = D2; electronic energy (EE) = -1617.4943 Hartree; EE + thermal free energy correction = -1616.9963 Hartree.

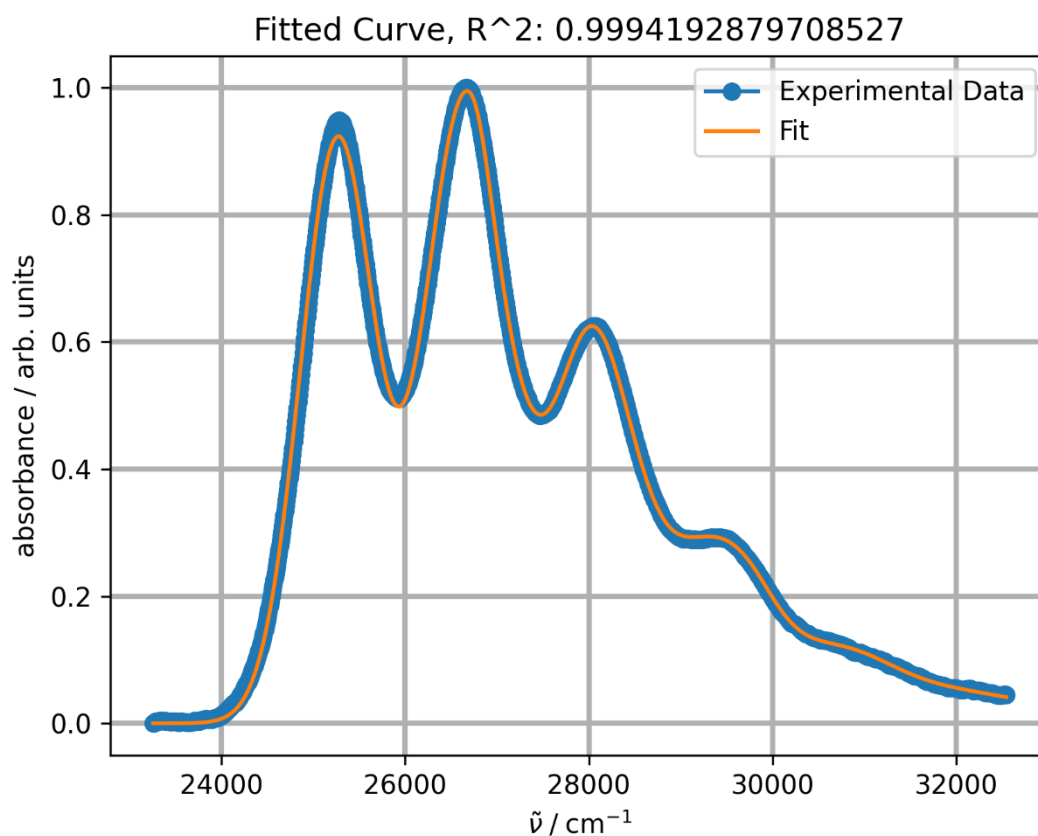

Figure 2S. Fitting results using three PF for DPA absorption spectrum in octane at 20°C

**Example of the PekarFit output.**

| S (A0) | $\nu_0$ (A1) cm <sup>-1</sup> | $\Omega$ (A2) cm <sup>-1</sup> | $\sigma_0$ (A3) | $\delta$ (A4) | A5 <sup>a</sup> |
|--------|-------------------------------|--------------------------------|-----------------|---------------|-----------------|
|--------|-------------------------------|--------------------------------|-----------------|---------------|-----------------|

<sup>a</sup> normalization coefficient

PekarFit\_18: DATA SUMMARY DPA Octane RT

R-squared: 0.9994192879708527

RMSE: 0.22604244649959926

AbsMax1, nm: 375.34964242904147

AbsMax2, nm: 351.6062022388348

Area\_1 (%): 88.22710401196643

Area\_2 (%): 8.324268575951995

Area\_3 (%): 2.6955703286836394

A0: 1.0063265180120915

A1: 25258.06733240906

A2: 1375.059693314594

A3: 406.51483530648284

A4: 29.64909110156226

A5: 9.842987203247978e-05

A6: 3.8645722280515384

A7: 26205.32691145041

A8: 578.4811233331503

A9: 0.20604971038950734

A10: 110.51327422603545

A11: 2.2506162671329346e-07

A12: 1.2985893781146998

A13: 29788.14213341122

A14: 1223.4129786167905

A15: 261.07888573991653

A16: 629.6054666867499

A17: 6.150805629471176e-07

StdDev A0: 0.0016702871861527526

StdDev A1: 0.596807471572824

StdDev A2: 0.7349339018753287

StdDev A3: 0.5602849500314602

StdDev A4: 0.7443835640207691  
StdDev A5: 1.7244708423672133e-07  
StdDev A6: 0.062224287302376516  
StdDev A7: 17.679579864738315  
StdDev A8: 10.983798179475572  
StdDev A9: 7.6257131632058295  
StdDev A10: 4.043680443465353  
StdDev A11: 1.9416727567483262e-08  
StdDev A12: 0.0793896214582211  
StdDev A13: 29.075938372839598  
StdDev A14: 75.12474159105207  
StdDev A15: 40.24725942560572  
StdDev A16: 124.89200281726144  
StdDev A17: 8.131367062382272e-08

### **Origin Absorption FDF**

---

[General Information]

Function Name = Pek9

Brief Description =

Function Source = N/A

Number Of Parameters = 7

Function Type = User-Defined

Function Form = Equations

Path =

Number Of Independent Variables = 1

Number Of Dependent Variables = 1

Function Model = Explicit

[Fitting Parameters]

Names = y0,A0,A1,A2,A3,A4,A5

Initial Values = 25400(V),1(V),25400(V),1390(V),370(V),50(V),0.1(V)

Meanings = ?,?,?,?,?,?,?

Lower Bounds = 12000(I, On),0.2(I, On),12000(I, On),100(I, On),10(I, On),10(I, On),0(I, On)

Upper Bounds = 40000(I, On),8(I, On),40000(I, On),2000(I, On),1000(I, On),1000(I, On),1(I, On)

Naming Method = User-Defined

Number Of Significant Digits = 0,0,0,0,0,0,0

Unit = ,,,,,,

Format = --,--,--,--,--,--,--

CustomDisplay = --,--,--,--,--,--,--

[Independent Variables]

x =

[Dependent Variables]

y =

[Formula]

$$y_0 = A_1$$

$$F_1 = \text{nlf\_gaussa}(x, 0, A_1, A_3, 1)$$

$$F_2 = A_0 * \text{nlf\_gaussa}(x, 0, A_1 + A_2, A_3 + A_4, 1)$$

$$F_3 = (A_0^2 / 2) * \text{nlf\_gaussa}(x, 0, A_1 + 2 * A_2, A_3 + 2 * A_4, 1)$$

$$F_4 = (A_0^3 / 6) * \text{nlf\_gaussa}(x, 0, A_1 + 3 * A_2, A_3 + 3 * A_4, 1)$$

$$F_5 = (A_0^4 / 24) * \text{nlf\_gaussa}(x, 0, A_1 + 4 * A_2, A_3 + 4 * A_4, 1)$$

$$F_6 = (A_0^5 / 120) * \text{nlf\_gaussa}(x, 0, A_1 + 5 * A_2, A_3 + 5 * A_4, 1)$$

$$F_7 = (A_0^6 / 720) * \text{nlf\_gaussa}(x, 0, A_1 + 6 * A_2, A_3 + 6 * A_4, 1)$$

$$F_8 = (A_0^7 / 5040) * \text{nlf\_gaussa}(x, 0, A_1 + 7 * A_2, A_3 + 7 * A_4, 1)$$

$$F_9 = (A_0^8 / 40320) * \text{nlf\_gaussa}(x, 0, A_1 + 8 * A_2, A_3 + 8 * A_4, 1)$$

$$y = A_5 * x * \text{EXP}(-A_0) * (F_1 + F_2 + F_3 + F_4 + F_5 + F_6 + F_7 + F_8 + F_9)$$

[Constraints]

[Initializations]

[After Fitting]

[Constants]

[Controls]

General Linear Constraints = 0

Initialization Scripts = 0

Scripts After Fitting = 0

Number Of Duplicates = 0

Duplicate Offset = 2

Duplicate Unit = 6

Generate Curves After Fitting = 1

Curve Point Spacing = Uniform on X-Axis Scale

Generate Peaks After Fitting = 1

Generate Peaks During Fitting = 1

Generate Peaks with Baseline = 1

Paste Parameters to Plot After Fitting = 1

Paste Parameters to Notes Window After Fitting = 1

Generate Residuals After Fitting = 0

Keep Parameters = 0

Compile On Param Change Script = 0

Enable Parameters Initialization = 1

Treat All Numbers As Double = 1

Peak Center = 3

Peak Width = 5

Peak Amplitude = 2



[Compile Function]

Compile = 0

Compile Parameters Initialization = 1

OnParamChangeScriptsEnabled = 0.

[Parameters Initialization]

//Code to be executed to initialize parameters

[Origin C Function Header]

[Origin C Parameter Initialization Header]

[Derived Parameters]

F1 = nlf\_gauss(x,0,A1,A3,1)

F2 = A0\*nlf\_gauss(x,0,A1+A2,A3+A4,1)

F3 = (A0^2/2)\*nlf\_gauss(x,0,A1+2\*A2,A3+2\*A4,1)

F4 = (A0^3/6)\*nlf\_gauss(x,0,A1+3\*A2,A3+3\*A4,1)

F5 = (A0^4/24)\*nlf\_gauss(x,0,A1+4\*A2,A3+4\*A4,1)

F6 = (A0^5/120)\*nlf\_gauss(x,0,A1+5\*A2,A3+5\*A4,1)

$$F7 = (A0^6/720)*nlf\_gauss(x,0,A1+6*A2,A3+6*A4,1)$$

$$F8 = (A0^7/5040)*nlf\_gauss(x,0,A1+7*A2,A3+7*A4,1)$$

$$F9 = (A0^8/40320)*nlf\_gauss(x,0,A1+8*A2,A3+8*A4,1)$$

[Derived Parameter Settings]

Unit = ,,,,,,,

Names = F1,F2,F3,F4,F5,F6,F7,F8,F9

Meanings = ,,,,,,,

[QuickCheck]

x=25000

y0=25400

A0=1

A1=25400

A2=1390

A3=370

A4=50

A5=0.1

## PeakFit Absorption UDF

---

pek9  
6

10

$$F1=GAUSSA(1,A1,A3)$$

$$F2=A0*GAUSSA(1,A1+A2,A3+A4)$$

$$F3=(A0^2/2)*GAUSSA(1,A1+2*A2,A3+2*A4)$$

$$F4=(A0^3/6)*GAUSSA(1,A1+3*A2,A3+3*A4)$$

$$F5=(A0^4/24)*GAUSSA(1,A1+4*A2,A3+4*A4)$$

$$F6=(A0^5/120)*GAUSSA(1,A1+5*A2,A3+5*A4)$$

$$F7=(A0^6/720)*GAUSSA(1,A1+6*A2,A3+6*A4)$$

$$F8=(A0^7/5040)*GAUSSA(1,A1+7*A2,A3+7*A4)$$

$$F9=(A0^8/40320)*GAUSSA(1,A1+8*A2,A3+8*A4)$$

$$Y=A5*X*EXP(-A0)*(F1+F2+F3+F4+F5+F6+F7+F8+F9)$$

0 1.245 10

1E+4 25400 1E+5

100 1396 2000

50 368 1000

10 53 1000

0 0.11 1

---

## PeakFit Fluorescence UDF

---

pek9

6

10

F1=GAUSSA(1,A1,A3)

F2=A0\*GAUSSA(1,A1-A2,A3+A4)

F3=(A0^2/2)\*GAUSSA(1,A1-2\*A2,A3+2\*A4)

F4=(A0^3/6)\*GAUSSA(1,A1-3\*A2,A3+3\*A4)

F5=(A0^4/24)\*GAUSSA(1,A1-4\*A2,A3+4\*A4)

F6=(A0^5/120)\*GAUSSA(1,A1-5\*A2,A3+5\*A4)

F7=(A0^6/720)\*GAUSSA(1,A1-6\*A2,A3+6\*A4)

F8=(A0^7/5040)\*GAUSSA(1,A1-7\*A2,A3+7\*A4)

$$F9=(A0^8/40320)*GAUSSA(1,A1-8*A2,A3+8*A4)$$

$$Y=A5*X*EXP(-A0)*(F1+F2+F3+F4+F5+F6+F7+F8+F9)$$

0 1.245 10

1E+4 25400 1E+5

100 1396 2000

50 368 1000

10 53 1000

0 0.11 1

### PeakFit fitting DPA spectrum output example (2 PF):

File Source: z:\documents\pekar\dpha\solvato\fits\hexaneen.txt

#### Fitted Parameters

r<sup>2</sup> Coef Det DF Adj r<sup>2</sup> Fit Std Err F-value

0.99709100 0.99705563 0.01632974 30786.1080

| Peak | Type       | a0         | a1         | a2         | a3         | a4         | a5 |
|------|------------|------------|------------|------------|------------|------------|----|
| 1    | pek8[UDF1] | 1.09604722 | 25480.1402 | 1385.05239 | 368.160840 | 40.6217023 |    |
| 2    | pek8[UDF1] | 3.11378874 | 25104.9861 | 1231.36834 | 890.385825 | 10.0018468 |    |

0.09471225

0.02472527

#### Measured Values

| Peak Type    | Amplitude  | Center     | FWHM       | Asym50     | FW Base    | Asym10     |
|--------------|------------|------------|------------|------------|------------|------------|
| 1 pek8[UDF1] | 0.87695878 | 25489.2968 | 2384.94849 | 4.46694767 | 6244.70081 | 6.04599604 |
| 2 pek8[UDF1] | 0.12066590 | 28582.0920 | 5588.11143 | 1.19801764 | 11079.5498 | 1.39617647 |

| Peak Type    | Anlytc Area | % Area | Int Area   | % Area     | Centroid   | Moment2    |
|--------------|-------------|--------|------------|------------|------------|------------|
| 1 pek8[UDF1] | Unknown     |        | 2553.83534 | 100.000000 | 27073.5628 | 2.3207e+06 |
| 2 pek8[UDF1] | Unknown     |        | 678.490646 | 26.5675173 | 28840.5649 | 4.2427e+06 |
| Total        |             |        | 2553.83534 | 100.000000 |            |            |

#### Parameter Statistics

##### Peak 1 pek8[UDF1]

| Parm | Value      | Std Error  | t-value    | 95                    |
|------|------------|------------|------------|-----------------------|
| a0   | 1.09604722 | 0.00726061 | 150.957972 | 1.08179923 1.11029521 |
| a1   | 25480.1402 | 0.74148770 | 34363.5372 | 25478.6851 25481.5952 |
| a2   | 1385.05239 | 1.05196027 | 1316.63945 | 1382.98806 1387.11673 |
| a3   | 368.160840 | 1.04214842 | 353.271026 | 366.115762 370.205919 |
| a4   | 40.6217023 | 0.88768341 | 45.7614752 | 38.8797408 42.3636637 |
| a5   | 0.09471225 | 0.00120998 | 78.2760699 | 0.09233783 0.09708667 |

##### Peak 2 pek8[UDF1]

| Parm | Value | Std Error | t-value | 95 |
|------|-------|-----------|---------|----|
|------|-------|-----------|---------|----|

a0 3.11378874 9.03349615 0.34469365 -14.613255 20.8408322  
 a1 25104.9861 5478.95033 4.58207952 14353.2695 35856.7027  
 a2 1231.36834 1814.35955 0.67867934 -2329.0727 4791.80939  
 a3 890.385825 1341.35830 0.66379418 -1741.8527 3522.62438  
 a4 10.0018468 445.102339 0.02247089 -863.45272 883.456418  
 a5 0.02472527 0.00126237 19.5863782 0.02224803 0.02720250

### Analysis of Variance

r<sup>2</sup> Coef Det DF Adj r<sup>2</sup> Fit Std Err

0.99709100 0.99705563 0.01632974

| Source | Sum of Squares | DF  | Mean Square   | F         |
|--------|----------------|-----|---------------|-----------|
| Regr   | 90.303848      | 11  | 8.2094407     | 30786.108 |
| Error  | 0.26346063     | 988 | 0.00026666056 |           |
| Total  | 90.567309      | 999 |               |           |

### Details of Fit

Set Convergence State Iterations Minimization Extent

1E-6 Converged 55 PVII Lim 1/1

Curvature Matrix Constraints Violated

Full None - None - None - None - None 0
